# Supplementary material
Source: PubMed Central journal article supplement (PMC7755948)
Supplement: DS_10.1177_0022034520947665.pdf [file DS_10.1177_0022034520947665.pdf]

## APPENDIX

### **Maternal oral health and breastfeeding habits influence infant salivary microbiome**

Kirtana Ramadugu\*, Deesha Bhaumik\*, Ting Luo, Rachel E. Gicquelais, Kyu Han Lee, Elizabeth B. Stafford, Carl F. Marrs, Katherine Neiswanger, Daniel W. McNeil, Mary L. Marazita, Betsy Foxman

\*Contributed equally to the manuscript

Kirtana Ramadugu – University of Michigan School of Public Health, Ann Arbor, Michigan, United States – [kramadu@umich.edu](mailto:kramadu@umich.edu)

Deesha Bhaumik - University of Michigan School of Public Health, Ann Arbor, Michigan, United States – [deesha@umich.edu](mailto:deesha@umich.edu)

Ting Luo – University of Michigan School of Public Health, Ann Arbor, Michigan, United States – [tingluo@umich.edu](mailto:tingluo@umich.edu)

Rachel E. Gicquelais – University of Michigan School of Public Health, Ann Arbor, Michigan, United States – [rgicquel@jhu.edu](mailto:rgicquel@jhu.edu)

Kyu Han Lee – University of Michigan School of Public Health, Ann Arbor, Michigan, United States – [klee225@jhmi.edu](mailto:klee225@jhmi.edu)

Elizabeth B. Stafford – University of Michigan School of Public Health, Ann Arbor, Michigan, United States – [elizabeth.b.stafford@gmail.com](mailto:elizabeth.b.stafford@gmail.com)

Carl F. Marrs – University of Michigan School of Public Health, Ann Arbor, Michigan, United States – [cfmarrs@umich.edu](mailto:cfmarrs@umich.edu)

Katherine Neiswanger - Center for Craniofacial and Dental Genetics, Department of Oral Biology, Department of Oral Biology; Department of Human Genetics, Graduate School of Public Health; University of Pittsburgh, Pittsburgh, Pennsylvania, United States – [knacct@pitt.edu](mailto:knacct@pitt.edu)

Daniel W. McNeil – West Virginia University, Morgantown, West Virginia, United States – [dmcneil@wvu.edu](mailto:dmcneil@wvu.edu)

Mary L. Marazita – Center for Craniofacial and Dental Genetics, Department of Oral Biology, Department of Oral Biology;  
Department of Human Genetics, Graduate School of Public Health; University of Pittsburgh, Pittsburgh, Pennsylvania, United States  
– marazita@pitt.edu

Betsy Foxman, Center of Molecular and Clinical Epidemiology of Infectious Diseases, Department of Epidemiology, University of  
Michigan School of Public Health, Ann Arbor, Michigan – bfoxman@umich.edu

Table of Contents:

Appendix Figure 1. Sensitivity analysis comparing frequency of presence/absence detection using qPCR of selected microorganisms before and after multiple imputation at 2-month and 12 month (n = 101). Infants in the Center for Oral Health Research 2 from the two study sites (Pennsylvania and West Virginia).

Appendix Figure 2. Shannon Diversity Index measure of the Alpha Diversity across Community State Type Groups for mothers and their children (n = 202; 505 samples). Participants in the Center for Oral Health Research 2 from the two study sites (Pennsylvania and West Virginia).

Appendix Figure 3. A. Alpha Diversity of all infants (n = 101, 303 samples) over time measured by Shannon Diversity Index B. Species Richness of all infants (n = 101, 303 samples) over time measured by Chao1. Participants in the Center for Oral Health Research 2 from the two study sites at all visits (Pennsylvania and West Virginia).

Appendix Figure 4. Shannon Diversity Index measure of Alpha Diversity for infants (n = 101, 303 samples) over time based on selected variables. A. Mother's oral health status (represented by number of Decayed, Missing, and Filled Teeth). B. Mother's education. C. Delivery Route (C-Section vs. Vaginal). D. Infant Fed with Breastmilk. Participants in the Center for Oral Health Research 2 from the two study sites at all visits (Pennsylvania and West Virginia).

Appendix Figure 5. Bray Curtis measure of Beta Diversity between mother-child pairs, within all children, and within all mothers at 2 and 12 months (Pennsylvania) and 2 and 24 months (West Virginia). A. Pennsylvania site (n = 77). B. West Virginia (n = 22).

Appendix Table 1. Primer sequences, protocol and references for identifying selected taxa using qPCR.

Appendix Table 2. Results of ALDEx2 analysis comparing relative abundance of taxa found among children and their mothers when the child was 12 months of age. 79 infants and their mothers. Positive effect size indicates more frequent in children, negative effect size indicates more frequent in mothers. Participants in the Center for Oral Health Research 2 from the two study sites (Pennsylvania (n = 77) and West Virginia (n = 2)).

Appendix Table 3. Prevalence of selected microorganisms using qPCR of mothers over time in Pennsylvania (n = 77) and West Virginia (n = 24). Participants in the Center for Oral Health Research 2.

Appendix Figure 1. Sensitivity analysis comparing frequency of presence/absence detection from qPCR of selected microorganisms before and after multiple imputation at Visit 3 (2 months) and Visit 5 (12 months) (n = 101). Infants in the Center for Oral Health Research 2 from the two study sites (Pennsylvania and West Virginia).

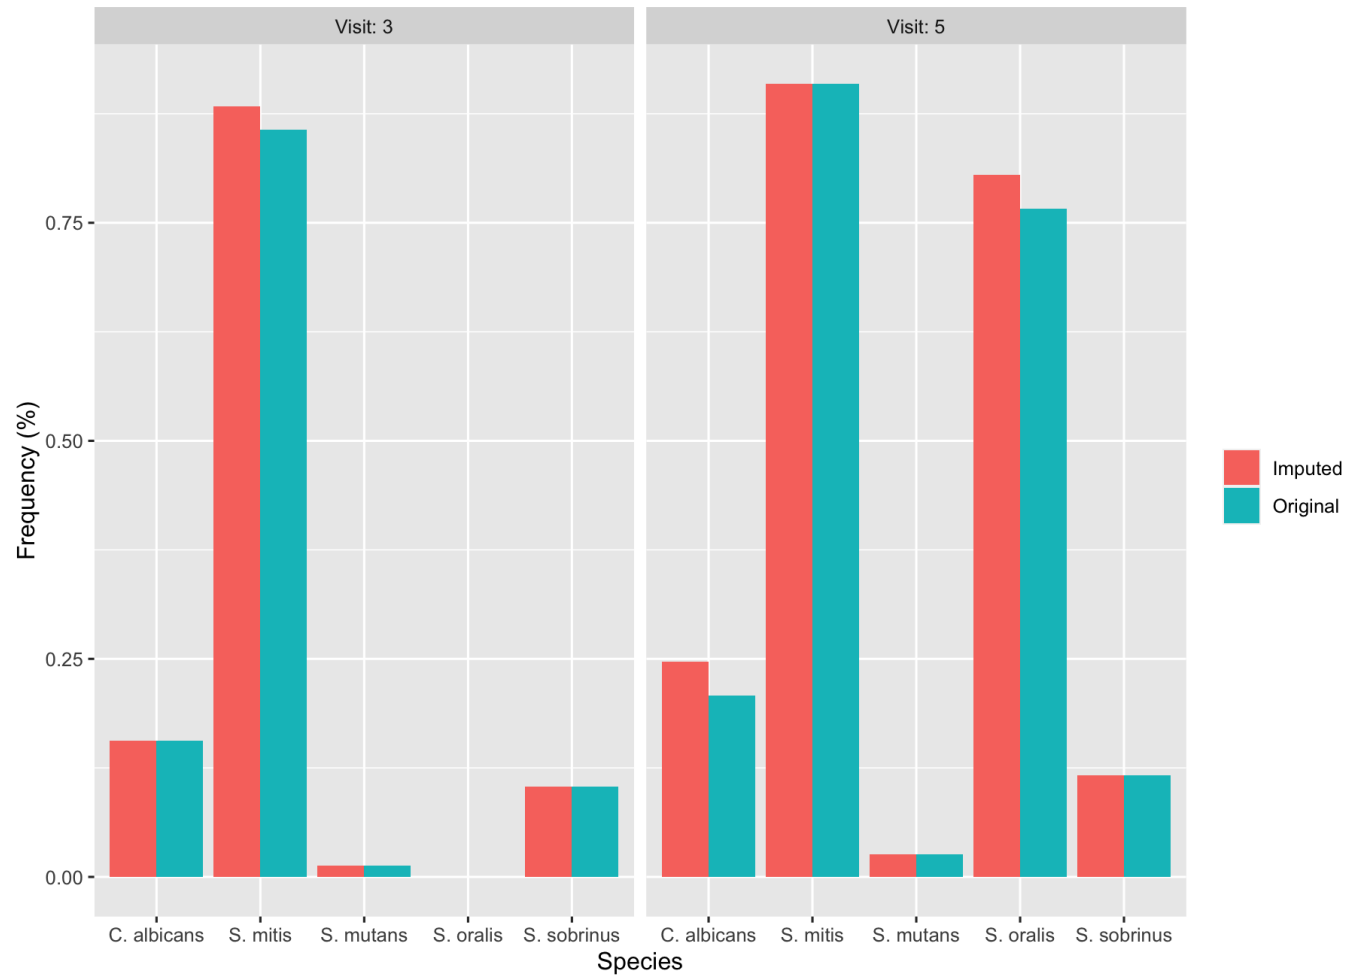

Appendix Figure 2. Shannon Diversity Index measure of the Alpha Diversity across Community State Type Groups for mothers and their children (n = 202; 505 samples). Participants in the Center for Oral Health Research 2 from the two study sites (Pennsylvania and West Virginia).

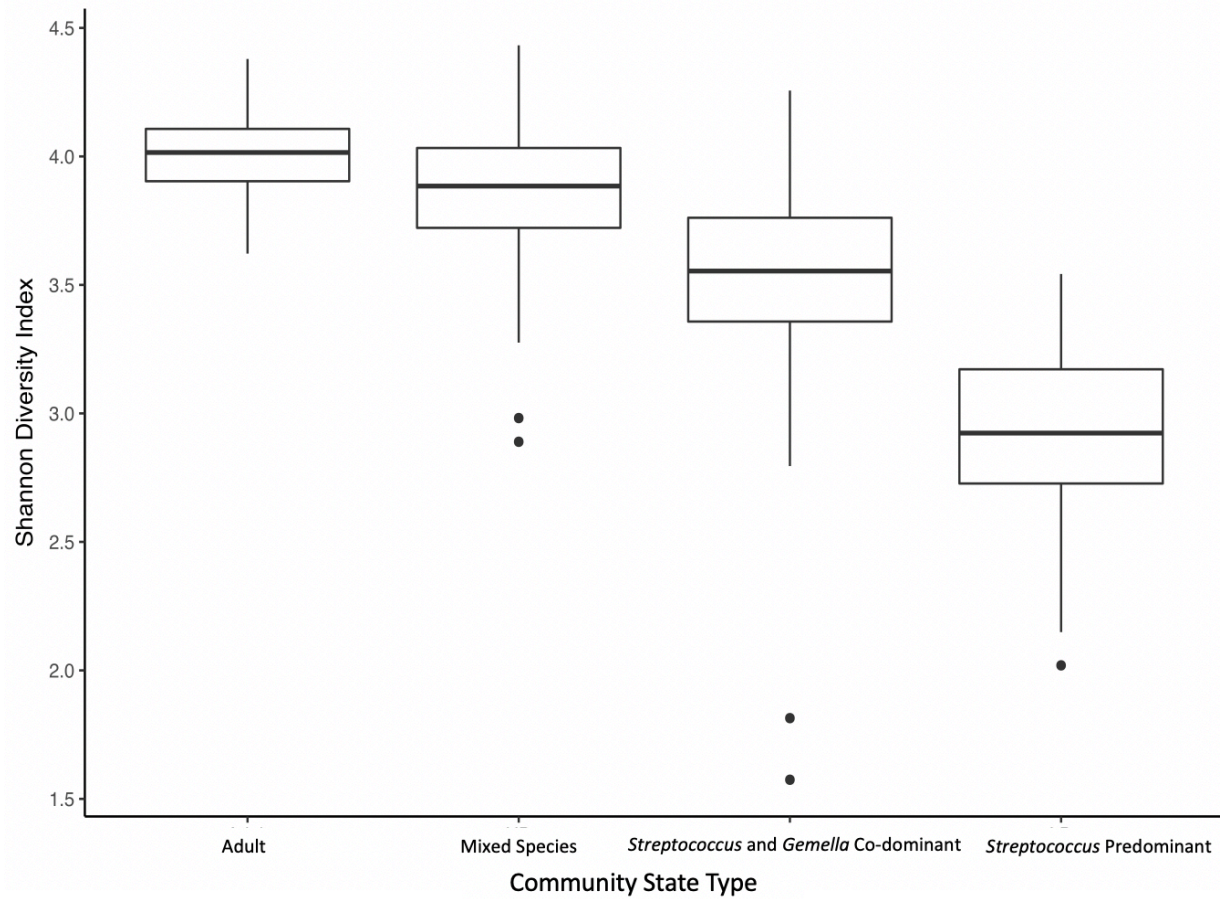

Appendix Figure 3. A. Alpha Diversity of all infants (n = 101, 303 samples) over time measured by Shannon Diversity Index B. Species Richness of all infants (n = 101, 303 samples) over time measured by Chao1. Participants in the Center for Oral Health Research 2 from the two study sites at all visits (Pennsylvania and West Virginia).

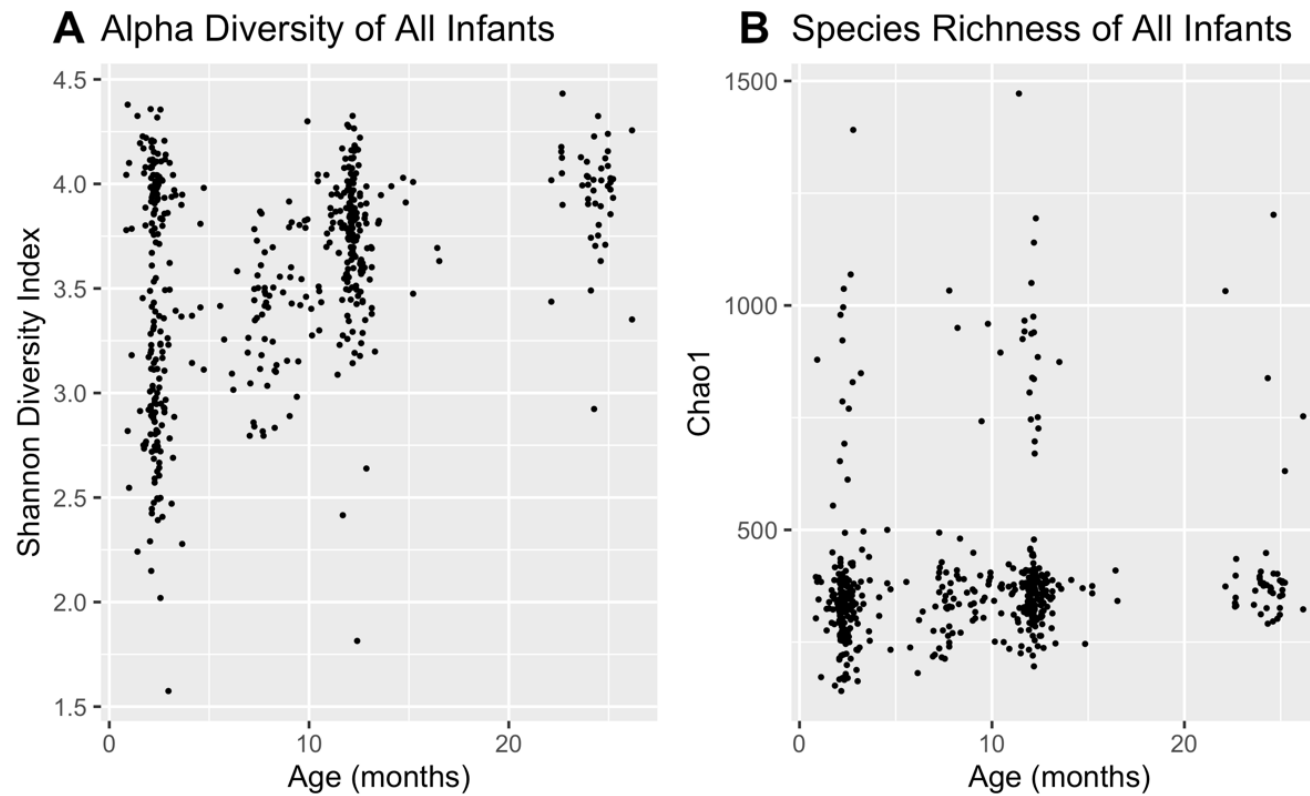

Appendix Figure 4. Shannon Diversity Index measure of Alpha Diversity for infants (n = 101, 303 samples) over time based on selected variables. A. Mother's oral health status (represented by number of Decayed, Missing, and Filled Teeth) . B. Mother's education. C. Delivery Route (C-Section vs. Vaginal). D. Infant Fed with Breastmilk. Participants in the Center for Oral Health Research 2 from the two study sites at all visits (Pennsylvania and West Virginia).

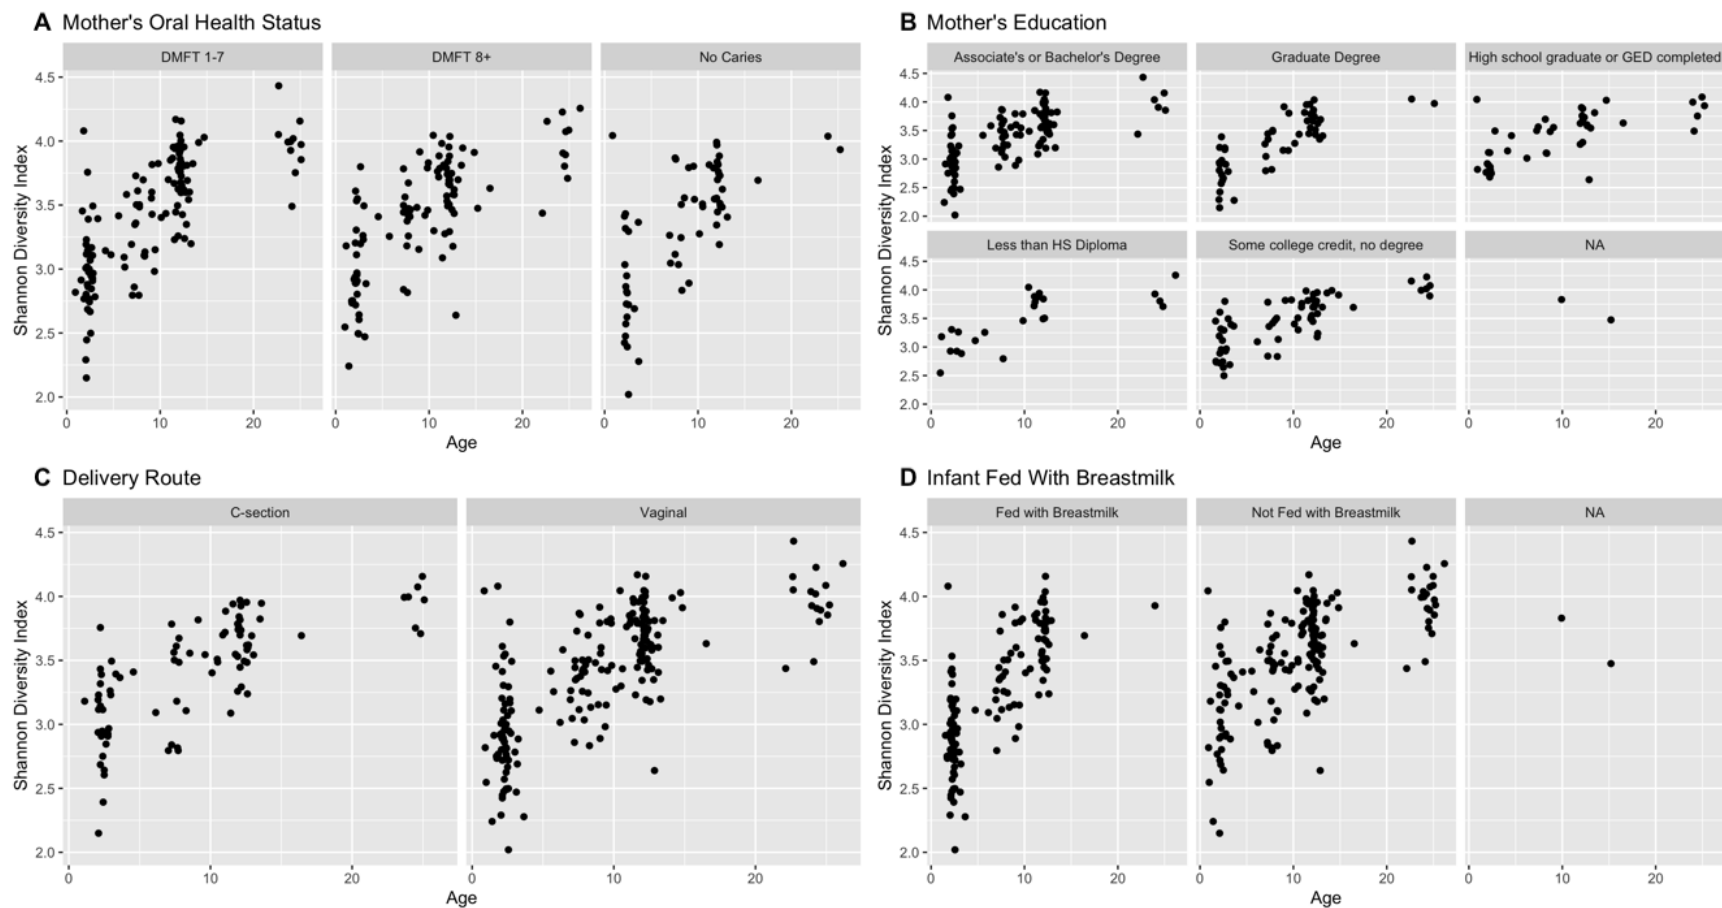

Appendix Figure 5. Bray Curtis measure of Beta Diversity between mother-child pairs, within all children, and within all mothers at 2 and 12 months (Pennsylvania) and 2 and 24 months (West Virginia). A. Pennsylvania site (n = 77). B. West Virginia (n = 22).

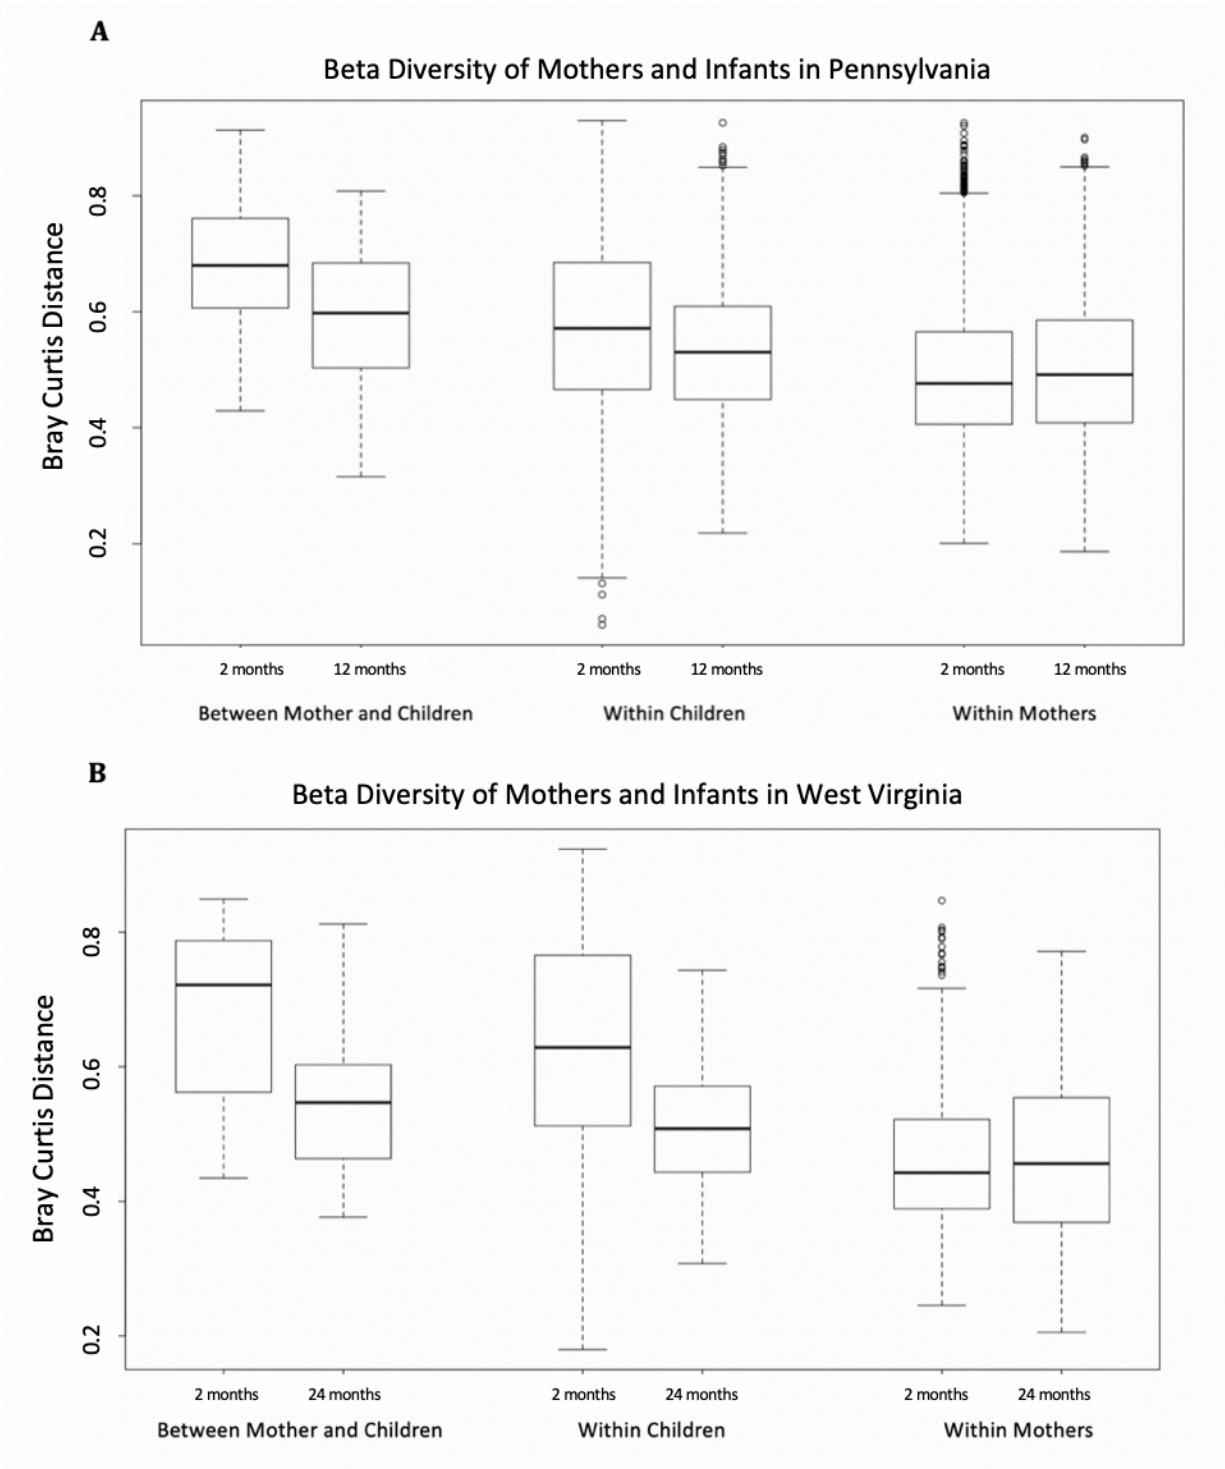



**Appendix Table 1. Primer sequences and protocol used for qPCR of saliva DNA samples**

| Organism           | Primer Sequence                              | Target      | Protocol                                                               | Reference                |
|--------------------|----------------------------------------------|-------------|------------------------------------------------------------------------|--------------------------|
| <i>S. oralis</i>   | Forward 5'-<br>TCCCGGTCAGCAAACCTCCAGCC-3'    | <i>gtfR</i> | 95 °C for 2 min;<br>40 cycles of<br>95 °C for 15 s,<br>60 °C for 1 min | Henne et al.<br>2014     |
|                    | Reverse 5'-<br>GCAACCTTTGGATTTGCAAC-3'       | <i>gdh</i>  |                                                                        |                          |
| <i>S. mitis</i>    | Forward 5'-<br>TGAAATCGAGGTTGGCCTAC-3'       |             | 95 °C for 2 min;<br>40 cycles of<br>95 °C for 15 s,<br>60 °C for 1 min | Henne et al.<br>2014     |
|                    | Reverse 5'-<br>CGTTTAGGAAAATCTC(G/T)CCCTT-3' |             |                                                                        |                          |
| <i>S. mutans</i>   | Forward 5'-<br>GCCTACAGCTCAGAGATGCTATTCT-3'  | <i>gtfB</i> | 50 °C for 2 min;<br>40 cycles of<br>95 °C for 10 s,<br>58 °C for 1 min | Yoshida et<br>al. 2003   |
|                    | Reverse 5'-<br>GCCATACACCACTCATGAATTGA-3'    |             |                                                                        |                          |
| <i>S. sobrinus</i> | Forward 5'-<br>TTCAAAGCCAAGACCAAGCTAGT-3'    | <i>gtfT</i> | 50 °C for 2 min;<br>40 cycles of<br>95 °C for 10 s,<br>58 °C for 1 min | Yoshida et<br>al. 2003   |
|                    | Reverse 5'-<br>CCAGCCTGAGATTCAGCTTGT-3'      |             |                                                                        |                          |
| <i>C. albicans</i> | Forward 5'- GGATCGCTTTGACAATGG-<br>3'        | 18s         | 98 °C for 2 min;<br>40 cycles of<br>98 °C for 1 s,<br>62 °C for 1 s    | Rosenthal<br>et al. 2014 |
|                    | Reverse 5'-<br>GCGGGTAGTCCTACCTGATTT -3'     |             |                                                                        |                          |

Appendix Table 2. Results of ALDEx2 analysis comparing relative abundance of taxa found among children and their mothers when the child was 12 months of age. 79 infants and their mothers. Positive effect size indicates more frequent in children, negative effect size indicates more frequent in mothers. Participants in the Center for Oral Health Research 2 from the two study sites (Pennsylvania (n = 77) and West Virginia (n = 2)).

| <b>More frequent in Children</b> |               | <b>More frequent in Mothers</b> |               |
|----------------------------------|---------------|---------------------------------|---------------|
| Genus*                           | Effect Size** | Genus*                          | Effect Size** |
| <i>Prevotella</i>                | 1.053         | <i>Gemella</i>                  | -1.669        |
| <i>Megasphaera</i>               | 1.568         | <i>Granulicatella</i>           | -1.491        |
| <i>Atopobium</i>                 | 1.667         | <i>Acinetobacter</i>            | -1.019        |
| <i>Campylobacter</i>             | 1.703         | <i>Enterococcus</i>             | -1.023        |
| <i>TM7</i>                       | 1.017         |                                 |               |
| <i>Selenomonas</i>               | 1.976         |                                 |               |
| <i>Solobacterium</i>             | 1.408         |                                 |               |

\* Only shown are taxa where the Benjamini-Hochberg corrected p-value was less than 0.05 and the effect size greater than 1

\*\* Effect size is the median of the ratio of the between group difference and the larger of the variance within groups

Appendix Table 3: Prevalence of selected microorganisms using qPCR of mothers over time in Pennsylvania (n = 77) and West Virginia (n = 24).

|                    | PA MOTHERS      |                  | WV MOTHERS      |                   |
|--------------------|-----------------|------------------|-----------------|-------------------|
|                    | <u>2 months</u> | <u>12 months</u> | <u>2 months</u> | <u>24 months*</u> |
| <i>S. mitis</i>    | 70.1%           | 63.6%            | 70.8%           | 63.6%             |
| <i>S. mutans</i>   | 57.1%           | 58.4%            | 70.8%           | 63.6%             |
| <i>S. oralis</i>   | 93.5%           | 94.8%            | 95.8%           | 100.0%            |
| <i>S. sobrinus</i> | 6.5 %           | 3.9%             | 83.3%           | 4.5%              |
| <i>C. albicans</i> | 10.4%           | 11.7%            | 16.7%           | 27.3%             |

\*n=22 at 24 months
